# Supplementary material for: Unraveling the Effect of Fire Seasonality on Fire-Preferred Fuel Types and Dynamics in Alto Minho, Portugal (2000–2018)
Source: MDPI journal article supplement (doi:10.3390/fire6070267), 2023-07-06
Supplement: s1 [file s1]

## Supplementary Materials

**Table S1.** Matrix of changes in fuel types (in hectares) in the study region between 2000 and 2018

|                | F-FOL          | F-PIN       | F-RAC         | M-CAD          | M-ESC      | M-EUC          | M-PIN          | V-MAa          | V-MMb         | V-MH          | V-Ha        | V-Hb           | NF             | TOTAL          | Losses  |
|----------------|----------------|-------------|---------------|----------------|------------|----------------|----------------|----------------|---------------|---------------|-------------|----------------|----------------|----------------|---------|
| <b>F-FOL</b>   | 14193.1        | 0.0         | 7.7           | 7.5            | 0.0        | 168.4          | 45.4           | 22.2           | 9.6           | 0.0           | 0.0         | 125.3          | 141.5          | <b>14720.7</b> | 527.6   |
| <b>F-PIN</b>   | 0.0            | 18.8        | 0.0           | 0.0            | 0.0        | 0.0            | 0.0            | 0.0            | 0.0           | 0.0           | 0.0         | 0.0            | 0.0            | <b>18.8</b>    | 0.0     |
| <b>F-RAC</b>   | 4.3            | 0.0         | 1211.9        | 0.0            | 0.0        | 77.5           | 155.6          | 208.4          | 0.0           | 0.0           | 0.0         | 1.5            | 0.0            | <b>1659.3</b>  | 447.4   |
| <b>M-CAD</b>   | 81.0           | 0.0         | 3.2           | 13347.2        | 0.0        | 66.4           | 42.5           | 15.5           | 3.2           | 0.0           | 0.0         | 25.2           | 32.7           | <b>13616.8</b> | 269.6   |
| <b>M-ESC</b>   | 0.0            | 0.0         | 0.0           | 0.0            | 1.6        | 1.6            | 0.0            | 0.0            | 0.0           | 0.0           | 0.0         | 0.0            | 0.0            | <b>3.2</b>     | 1.6     |
| <b>M-EUC</b>   | 63.9           | 0.0         | 0.6           | 7.3            | 0.0        | 16619.0        | 17.7           | 48.7           | 0.4           | 0.0           | 0.0         | 49.6           | 297.8          | <b>17104.9</b> | 485.9   |
| <b>M-PIN</b>   | 1100.0         | 0.0         | 36.9          | 62.1           | 0.0        | 7644.7         | 31079.2        | 1374.6         | 30.8          | 2.2           | 0.0         | 450.3          | 1156.3         | <b>42937.1</b> | 11857.9 |
| <b>V-MAa</b>   | 1039.0         | 0.0         | 100.6         | 293.3          | 0.0        | 1833.2         | 2524.2         | 56328.9        | 15.9          | 40.8          | 0.0         | 209.2          | 536.8          | <b>62922.0</b> | 6593.1  |
| <b>V-MMb</b>   | 287.9          | 0.0         | 1.6           | 172.6          | 0.0        | 18.8           | 23.6           | 48.8           | 4215.6        | 0.0           | 0.0         | 115.4          | 200.7          | <b>5085.1</b>  | 869.4   |
| <b>V-MH</b>    | 0.4            | 0.0         | 0.0           | 0.0            | 0.0        | 0.3            | 12.8           | 0.0            | 0.0           | 5228.6        | 0.0         | 0.0            | 30.9           | <b>5272.9</b>  | 44.3    |
| <b>V-Ha</b>    | 36.0           | 0.0         | 0.6           | 39.1           | 0.0        | 6.9            | 1.7            | 41.3           | 20.4          | 0.0           | 11.1        | 609.7          | 27.2           | <b>794.0</b>   | 783.0   |
| <b>V-Hb</b>    | 963.9          | 2.3         | 1.3           | 224.6          | 0.0        | 190.4          | 97.1           | 403.1          | 309.1         | 0.0           | 0.0         | 35444.1        | 1467.6         | <b>39103.5</b> | 3659.4  |
| <b>NF</b>      | 87.5           | 0.0         | 0.0           | 0.0            | 0.0        | 9.2            | 12.8           | 36.4           | 1.1           | 0.0           | 0.0         | 8.8            | 18437.1        | <b>18592.9</b> | 155.8   |
| <b>TOTAL</b>   | <b>17857.0</b> | <b>21.1</b> | <b>1364.4</b> | <b>14153.9</b> | <b>1.6</b> | <b>26636.3</b> | <b>34012.5</b> | <b>58528.1</b> | <b>4606.2</b> | <b>5271.5</b> | <b>11.1</b> | <b>37039.1</b> | <b>22328.6</b> |                |         |
| <b>Gains</b>   | 3663.9         | 2.3         | 152.5         | 806.7          | 0.0        | 10017.3        | 2933.3         | 2199.1         | 390.6         | 42.9          | 0.0         | 1595.0         | 3891.5         |                |         |
| <b>Balance</b> | 3136.3         | 2.3         | -294.9        | 537.1          | -1.6       | 9531.3         | -8924.6        | -4394.0        | -478.9        | -1.3          | -783.0      | -2064.4        | 3735.7         |                |         |

**Table S2.** Matrix of changes in fuel types (in hectares) between 2000 and 2018 in the burned area

|                | F-FOL         | F-PIN      | F-RAC        | M-CAD         | M-ESC      | M-EUC          | M-PIN          | V-MAa          | V-MMb        | V-MH          | V-Ha       | V-Hb          | NF           | TOTAL          | Losses |
|----------------|---------------|------------|--------------|---------------|------------|----------------|----------------|----------------|--------------|---------------|------------|---------------|--------------|----------------|--------|
| <b>F-FOL</b>   | 4004.8        | 0.0        | 4.0          | 5.2           | 0.0        | 83.3           | 24.0           | 9.5            | 1.1          | 0.0           | 0.0        | 9.4           | 2.5          | <b>4143.7</b>  | 138.9  |
| <b>F-PIN</b>   | 0.0           | 3.4        | 0.0          | 0.0           | 0.0        | 0.0            | 0.0            | 0.0            | 0.0          | 0.0           | 0.0        | 0.0           | 0.0          | <b>3.4</b>     | 0.0    |
| <b>F-RAC</b>   | 2.5           | 0.0        | 615.0        | 0.0           | 0.0        | 69.7           | 2.2            | 207.0          | 0.0          | 0.0           | 0.0        | 0.2           | 0.0          | <b>896.6</b>   | 281.6  |
| <b>M-CAD</b>   | 22.5          | 0.0        | 0.1          | 5040.8        | 0.0        | 39.1           | 26.3           | 10.5           | 1.3          | 0.0           | 0.0        | 1.6           | 1.1          | <b>5143.3</b>  | 102.5  |
| <b>M-ESC</b>   | 0.0           | 0.0        | 0.0          | 0.0           | 1.6        | 0.0            | 0.0            | 0.0            | 0.0          | 0.0           | 0.0        | 0.0           | 0.0          | <b>1.6</b>     | 0.0    |
| <b>M-EUC</b>   | 27.2          | 0.0        | 0.0          | 7.0           | 0.0        | 11619.9        | 12.2           | 40.4           | 0.1          | 0.0           | 0.0        | 18.2          | 78.3         | <b>11803.3</b> | 183.3  |
| <b>M-PIN</b>   | 440.5         | 0.0        | 8.9          | 57.7          | 0.0        | 4462.7         | 13655.7        | 1285.9         | 2.8          | 2.2           | 0.0        | 150.6         | 151.9        | <b>20218.9</b> | 6563.2 |
| <b>V-MAa</b>   | 712.0         | 0.0        | 65.2         | 154.7         | 0.0        | 1522.1         | 1539.9         | 49206.9        | 2.6          | 33.6          | 0.0        | 112.1         | 126.6        | <b>53475.8</b> | 4268.9 |
| <b>V-MMb</b>   | 39.6          | 0.0        | 0.5          | 11.6          | 0.0        | 1.6            | 15.6           | 18.8           | 251.9        | 0.0           | 0.0        | 5.9           | 1.6          | <b>347.1</b>   | 345.5  |
| <b>V-MH</b>    | 0.2           | 0.0        | 0.0          | 0.0           | 0.0        | 0.3            | 1.6            | 0.0            | 0.0          | 3514.4        | 0.0        | 0.0           | 9.7          | <b>3526.1</b>  | 11.7   |
| <b>V-Ha</b>    | 0.3           | 0.0        | 0.2          | 3.2           | 0.0        | 3.9            | 0.0            | 7.3            | 0.1          | 0.0           | 0.0        | 73.7          | 0.1          | <b>88.8</b>    | 88.7   |
| <b>V-Hb</b>    | 44.9          | 0.0        | 0.0          | 32.0          | 0.0        | 35.3           | 6.1            | 40.9           | 23.2         | 0.0           | 0.0        | 1068.8        | 12.7         | <b>1263.8</b>  | 195.0  |
| <b>NF</b>      | 9.3           | 0.0        | 0.0          | 0.0           | 0.0        | 0.7            | 1.3            | 2.0            | 0.0          | 0.0           | 0.0        | 0.0           | 359.6        | <b>372.9</b>   | 370.9  |
| <b>TOTAL</b>   | <b>5303.8</b> | <b>3.4</b> | <b>694.0</b> | <b>5312.1</b> | <b>1.6</b> | <b>17838.5</b> | <b>15284.7</b> | <b>50829.2</b> | <b>283.1</b> | <b>3550.2</b> | <b>0.0</b> | <b>1440.5</b> | <b>744.1</b> |                |        |
| <b>Gains</b>   | 1299.0        | 0.0        | 79.0         | 271.4         | 0.0        | 6218.6         | 1629.1         | 1622.3         | 31.2         | 35.8          | 0.0        | 371.7         | 384.5        |                |        |
| <b>Balance</b> | 1160.1        | 0.0        | -202.6       | 168.9         | 0.0        | 6035.2         | -4934.2        | -2646.6        | -314.3       | 24.1          | -88.7      | 176.7         | 13.6         |                |        |

**Table S3.** Matrix of changes in fuel types (in hectares) between 2000 and 2018 in the burned area by fire-season fires

|                | F-FOL         | F-PIN      | F-RAC        | M-CAD         | M-ESC      | M-EUC          | M-PIN          | V-MAa          | V-MMb        | V-MH          | V-Ha       | V-Hb         | NF           | TOTAL          | Losses |
|----------------|---------------|------------|--------------|---------------|------------|----------------|----------------|----------------|--------------|---------------|------------|--------------|--------------|----------------|--------|
| <b>F-FOL</b>   | 3293.5        | 0.0        | 3.4          | 5.1           | 0.0        | 74.2           | 21.3           | 9.5            | 1.1          | 0.0           | 0.0        | 8.5          | 1.7          | <b>3418.2</b>  | 124.7  |
| <b>F-PIN</b>   | 0.0           | 3.4        | 0.0          | 0.0           | 0.0        | 0.0            | 0.0            | 0.0            | 0.0          | 0.0           | 0.0        | 0.0          | 0.0          | <b>3.4</b>     | 0.0    |
| <b>F-RAC</b>   | 2.5           | 0.0        | 459.7        | 0.0           | 0.0        | 69.0           | 1.3            | 202.6          | 0.0          | 0.0           | 0.0        | 0.2          | 0.0          | <b>735.2</b>   | 275.5  |
| <b>M-CAD</b>   | 14.1          | 0.0        | 0.0          | 3584.6        | 0.0        | 36.2           | 25.6           | 6.9            | 0.0          | 0.0           | 0.0        | 0.8          | 1.1          | <b>3669.5</b>  | 84.9   |
| <b>M-ESC</b>   | 0.0           | 0.0        | 0.0          | 0.0           | 1.6        | 0.0            | 0.0            | 0.0            | 0.0          | 0.0           | 0.0        | 0.0          | 0.0          | <b>1.6</b>     | 0.0    |
| <b>M-EUC</b>   | 23.6          | 0.0        | 0.0          | 7.0           | 0.0        | 10821.3        | 10.4           | 40.3           | 0.1          | 0.0           | 0.0        | 17.4         | 74.7         | <b>10994.8</b> | 173.4  |
| <b>M-PIN</b>   | 376.6         | 0.0        | 8.9          | 53.3          | 0.0        | 4066.1         | 10739.5        | 1235.2         | 2.7          | 2.2           | 0.0        | 106.4        | 139.4        | <b>16730.4</b> | 5990.9 |
| <b>V-MAa</b>   | 571.8         | 0.0        | 44.3         | 82.6          | 0.0        | 1412.2         | 915.0          | 37369.7        | 1.4          | 27.8          | 0.0        | 97.9         | 106.6        | <b>40629.3</b> | 3259.6 |
| <b>V-MMb</b>   | 28.6          | 0.0        | 0.5          | 8.5           | 0.0        | 1.4            | 13.8           | 10.9           | 194.6        | 0.0           | 0.0        | 3.8          | 1.6          | <b>263.6</b>   | 69.0   |
| <b>V-MH</b>    | 0.0           | 0.0        | 0.0          | 0.0           | 0.0        | 0.3            | 0.0            | 0.0            | 0.0          | 1743.6        | 0.0        | 0.0          | 3.8          | <b>1747.6</b>  | 4.0    |
| <b>V-Ha</b>    | 0.3           | 0.0        | 0.2          | 2.5           | 0.0        | 3.8            | 0.0            | 7.1            | 0.1          | 0.0           | 0.0        | 46.7         | 0.1          | <b>60.7</b>    | 60.7   |
| <b>V-Hb</b>    | 31.6          | 0.0        | 0.0          | 23.1          | 0.0        | 33.2           | 3.9            | 22.1           | 13.8         | 0.0           | 0.0        | 562.1        | 11.1         | <b>700.9</b>   | 138.9  |
| <b>NF</b>      | 9.3           | 0.0        | 0.0          | 0.0           | 0.0        | 0.7            | 1.3            | 1.8            | 0.0          | 0.0           | 0.0        | 0.0          | 301.6        | <b>314.6</b>   | 13.1   |
| <b>TOTAL</b>   | <b>4352.0</b> | <b>3.4</b> | <b>517.1</b> | <b>3766.7</b> | <b>1.6</b> | <b>16518.3</b> | <b>11732.1</b> | <b>38906.0</b> | <b>213.9</b> | <b>1773.6</b> | <b>0.0</b> | <b>843.8</b> | <b>641.6</b> |                |        |
| <b>Gains</b>   | 1058.4        | 0.0        | 57.4         | 182.1         | 0.0        | 5697.0         | 992.5          | 1536.3         | 19.2         | 30.0          | 0.0        | 281.7        | 340.0        |                |        |
| <b>Balance</b> | 933.8         | 0.0        | -218.1       | 97.2          | 0.0        | 5523.5         | -4998.4        | -1723.3        | -49.8        | 26.0          | -60.7      | 142.8        | 327.0        |                |        |

**Table S4.** Matrix of changes in fuel types (in hectares) between 2000 and 2018 in the burned area by unseasonal fires

|                | F-FOL         | F-PIN      | F-RAC        | M-CAD         | M-ESC      | M-EUC         | M-PIN         | V-MAa          | V-MMb       | V-MH          | V-Ha       | V-Hb         | NF           | TOTAL          | Losses |
|----------------|---------------|------------|--------------|---------------|------------|---------------|---------------|----------------|-------------|---------------|------------|--------------|--------------|----------------|--------|
| <b>F-FOL</b>   | 1491.0        | 0.0        | 2.0          | 2.5           | 0.0        | 23.0          | 6.7           | 1.4            | 0.0         | 0.0           | 0.0        | 1.0          | 0.9          | <b>1528.5</b>  | 37.6   |
| <b>F-PIN</b>   | 0.0           | 0.0        | 0.0          | 0.0           | 0.0        | 0.0           | 0.0           | 0.0            | 0.0         | 0.0           | 0.0        | 0.0          | 0.0          | <b>0.0</b>     | 0.0    |
| <b>F-RAC</b>   | 0.0           | 0.0        | 236.0        | 0.0           | 0.0        | 4.9           | 1.9           | 96.5           | 0.0         | 0.0           | 0.0        | 0.0          | 0.0          | <b>339.3</b>   | 103.3  |
| <b>M-CAD</b>   | 11.0          | 0.0        | 0.1          | 2135.2        | 0.0        | 11.2          | 1.3           | 6.1            | 1.3         | 0.0           | 0.0        | 0.9          | 0.0          | <b>2167.1</b>  | 31.9   |
| <b>M-ESC</b>   | 0.0           | 0.0        | 0.0          | 0.0           | 1.2        | 0.0           | 0.0           | 0.0            | 0.0         | 0.0           | 0.0        | 0.0          | 0.0          | <b>1.2</b>     | 0.0    |
| <b>M-EUC</b>   | 6.7           | 0.0        | 0.0          | 0.0           | 0.0        | 3435.3        | 4.7           | 11.9           | 0.0         | 0.0           | 0.0        | 7.8          | 6.7          | <b>3473.1</b>  | 37.8   |
| <b>M-PIN</b>   | 162.5         | 0.0        | 2.6          | 55.8          | 0.0        | 1118.8        | 5394.2        | 583.1          | 0.1         | 0.0           | 0.0        | 48.7         | 17.2         | <b>7383.1</b>  | 1988.9 |
| <b>V-MAa</b>   | 238.2         | 0.0        | 50.7         | 87.5          | 0.0        | 497.2         | 861.3         | 31774.6        | 1.3         | 18.0          | 0.0        | 43.5         | 35.3         | <b>33607.5</b> | 1832.9 |
| <b>V-MMb</b>   | 12.9          | 0.0        | 0.0          | 4.2           | 0.0        | 0.2           | 14.5          | 11.1           | 80.2        | 0.0           | 0.0        | 2.1          | 0.0          | <b>125.4</b>   | 45.2   |
| <b>V-MH</b>    | 0.2           | 0.0        | 0.0          | 0.0           | 0.0        | 0.2           | 1.6           | 0.0            | 0.0         | 2161.2        | 0.0        | 0.0          | 7.6          | <b>2170.7</b>  | 9.5    |
| <b>V-Ha</b>    | 0.0           | 0.0        | 0.0          | 0.7           | 0.0        | 1.5           | 0.0           | 2.5            | 0.0         | 0.0           | 0.0        | 38.4         | 0.0          | <b>43.1</b>    | 43.1   |
| <b>V-Hb</b>    | 15.2          | 0.0        | 0.0          | 11.9          | 0.0        | 3.1           | 2.4           | 18.9           | 10.4        | 0.0           | 0.0        | 557.9        | 1.7          | <b>621.5</b>   | 63.6   |
| <b>NF</b>      | 0.1           | 0.0        | 0.0          | 0.0           | 0.0        | 0.0           | 0.0           | 0.2            | 0.0         | 0.0           | 0.0        | 0.0          | 110.5        | <b>110.8</b>   | 0.3    |
| <b>TOTAL</b>   | <b>1937.7</b> | <b>0.0</b> | <b>291.4</b> | <b>2297.8</b> | <b>1.2</b> | <b>5095.5</b> | <b>6288.8</b> | <b>32506.4</b> | <b>93.2</b> | <b>2179.2</b> | <b>0.0</b> | <b>700.3</b> | <b>180.0</b> |                |        |
| <b>Gains</b>   | 446.8         | 0.0        | 55.4         | 162.6         | 0.0        | 1660.2        | 894.5         | 731.8          | 13.0        | 18.0          | 0.0        | 142.4        | 69.4         |                |        |
| <b>Balance</b> | 409.2         | 0.0        | -47.9        | 130.7         | 0.0        | 1622.3        | -1094.4       | -1101.2        | -32.2       | 8.5           | -43.1      | 78.8         | 69.2         |                |        |

**Table S5.** Matrix of changes in fuel types (in hectares) between 2000 and 2018 in the burned area resulting from the spatial intersection between seasonal and unseasonal fires

|                | F-FOL        | F-PIN      | F-RAC        | M-CAD        | M-ESC      | M-EUC         | M-PIN         | V-MAa          | V-MMb       | V-MH         | V-Ha       | V-Hb         | NF          | TOTAL          | Losses |
|----------------|--------------|------------|--------------|--------------|------------|---------------|---------------|----------------|-------------|--------------|------------|--------------|-------------|----------------|--------|
| <b>F-FOL</b>   | 779.7        | 0.0        | 1.4          | 2.4          | 0.0        | 13.9          | 4.0           | 1.4            | 0.0         | 0.0          | 0.0        | 0.2          | 0.1         | <b>803.1</b>   | 23.4   |
| <b>F-PIN</b>   | 0.0          | 0.0        | 0.0          | 0.0          | 0.0        | 0.0           | 0.0           | 0.0            | 0.0         | 0.0          | 0.0        | 0.0          | 0.0         | <b>0.0</b>     | 0.0    |
| <b>F-RAC</b>   | 0.0          | 0.0        | 80.6         | 0.0          | 0.0        | 4.2           | 1.0           | 92.0           | 0.0         | 0.0          | 0.0        | 0.0          | 0.0         | <b>177.9</b>   | 97.2   |
| <b>M-CAD</b>   | 2.6          | 0.0        | 0.0          | 679.0        | 0.0        | 8.4           | 0.6           | 2.5            | 0.0         | 0.0          | 0.0        | 0.2          | 0.0         | <b>693.3</b>   | 14.3   |
| <b>M-ESC</b>   | 0.0          | 0.0        | 0.0          | 0.0          | 1.2        | 0.0           | 0.0           | 0.0            | 0.0         | 0.0          | 0.0        | 0.0          | 0.0         | <b>1.2</b>     | 0.0    |
| <b>M-EUC</b>   | 3.1          | 0.0        | 0.0          | 0.0          | 0.0        | 2636.7        | 2.9           | 11.8           | 0.0         | 0.0          | 0.0        | 7.0          | 3.1         | <b>2664.6</b>  | 27.9   |
| <b>M-PIN</b>   | 98.7         | 0.0        | 2.6          | 51.4         | 0.0        | 722.2         | 2478.1        | 532.5          | 0.0         | 0.0          | 0.0        | 4.5          | 4.7         | <b>3894.7</b>  | 1416.6 |
| <b>V-MAa</b>   | 98.0         | 0.0        | 29.8         | 15.4         | 0.0        | 387.3         | 236.5         | 19937.3        | 0.0         | 12.2         | 0.0        | 29.2         | 15.2        | <b>20761.0</b> | 823.7  |
| <b>V-MMb</b>   | 1.9          | 0.0        | 0.0          | 1.1          | 0.0        | 0.0           | 12.7          | 3.2            | 23.0        | 0.0          | 0.0        | 0.0          | 0.0         | <b>41.9</b>    | 18.9   |
| <b>V-MH</b>    | 0.0          | 0.0        | 0.0          | 0.0          | 0.0        | 0.2           | 0.0           | 0.0            | 0.0         | 390.4        | 0.0        | 0.0          | 1.7         | <b>392.2</b>   | 1.9    |
| <b>V-Ha</b>    | 0.0          | 0.0        | 0.0          | 0.0          | 0.0        | 1.4           | 0.0           | 2.2            | 0.0         | 0.0          | 0.0        | 11.3         | 0.0         | <b>15.0</b>    | 15.0   |
| <b>V-Hb</b>    | 1.9          | 0.0        | 0.0          | 3.0          | 0.0        | 1.0           | 0.3           | 0.1            | 1.0         | 0.0          | 0.0        | 51.2         | 0.1         | <b>58.6</b>    | 7.4    |
| <b>NF</b>      | 0.1          | 0.0        | 0.0          | 0.0          | 0.0        | 0.0           | 0.0           | 0.0            | 0.0         | 0.0          | 0.0        | 0.0          | 52.5        | <b>52.5</b>    | 0.1    |
| <b>TOTAL</b>   | <b>985.9</b> | <b>0.0</b> | <b>114.5</b> | <b>752.3</b> | <b>1.2</b> | <b>3775.3</b> | <b>2736.1</b> | <b>20583.2</b> | <b>24.0</b> | <b>402.6</b> | <b>0.0</b> | <b>103.5</b> | <b>77.4</b> |                |        |
| <b>Gains</b>   | 206.2        | 0.0        | 33.8         | 73.3         | 0.0        | 1138.6        | 258.0         | 645.8          | 1.1         | 12.2         | 0.0        | 52.4         | 25.0        |                |        |
| <b>Balance</b> | 182.8        | 0.0        | -63.4        | 59.0         | 0.0        | 1110.6        | -1158.6       | -177.8         | -17.9       | 10.3         | -15.0      | 44.9         | -27.5       |                |        |

**Table S6.** Matrix of changes in fuel types (in hectares) between 2000 and 2018 in the burned area by fire-season fires only

|                | F-FOL         | F-PIN      | F-RAC        | M-CAD         | M-ESC      | M-EUC          | M-PIN         | V-MAa          | V-MMb        | V-MH          | V-Ha       | V-Hb         | NF           | TOTAL          | Losses |
|----------------|---------------|------------|--------------|---------------|------------|----------------|---------------|----------------|--------------|---------------|------------|--------------|--------------|----------------|--------|
| <b>F-FOL</b>   | 2513.8        | 0.0        | 2.0          | 2.7           | 0.0        | 60.3           | 17.3          | 8.1            | 1.1          | 0.0           | 0.0        | 8.3          | 1.6          | <b>2615.1</b>  | 101.3  |
| <b>F-PIN</b>   | 0.0           | 3.4        | 0.0          | 0.0           | 0.0        | 0.0            | 0.0           | 0.0            | 0.0          | 0.0           | 0.0        | 0.0          | 0.0          | <b>3.4</b>     | 0.0    |
| <b>F-RAC</b>   | 2.5           | 0.0        | 379.0        | 0.0           | 0.0        | 64.8           | 0.3           | 110.6          | 0.0          | 0.0           | 0.0        | 0.2          | 0.0          | <b>557.4</b>   | 178.3  |
| <b>M-CAD</b>   | 11.6          | 0.0        | 0.0          | 2905.6        | 0.0        | 27.9           | 25.0          | 4.4            | 0.0          | 0.0           | 0.0        | 0.7          | 1.1          | <b>2976.2</b>  | 70.6   |
| <b>M-ESC</b>   | 0.0           | 0.0        | 0.0          | 0.0           | 0.4        | 0.0            | 0.0           | 0.0            | 0.0          | 0.0           | 0.0        | 0.0          | 0.0          | <b>0.4</b>     | 0.0    |
| <b>M-EUC</b>   | 20.5          | 0.0        | 0.0          | 7.0           | 0.0        | 8184.6         | 7.5           | 28.5           | 0.1          | 0.0           | 0.0        | 10.4         | 71.6         | <b>8330.1</b>  | 145.5  |
| <b>M-PIN</b>   | 277.9         | 0.0        | 6.3          | 1.9           | 0.0        | 3343.9         | 8261.4        | 702.7          | 2.7          | 2.2           | 0.0        | 101.9        | 134.7        | <b>12835.8</b> | 4574.3 |
| <b>V-MAa</b>   | 473.8         | 0.0        | 14.6         | 67.2          | 0.0        | 1024.9         | 678.5         | 17432.3        | 1.4          | 15.6          | 0.0        | 68.7         | 91.3         | <b>19868.3</b> | 2435.9 |
| <b>V-MMb</b>   | 26.7          | 0.0        | 0.5          | 7.4           | 0.0        | 1.4            | 1.1           | 7.7            | 171.7        | 0.0           | 0.0        | 3.7          | 1.6          | <b>221.7</b>   | 50.1   |
| <b>V-MH</b>    | 0.0           | 0.0        | 0.0          | 0.0           | 0.0        | 0.1            | 0.0           | 0.0            | 0.0          | 1353.2        | 0.0        | 0.0          | 2.1          | <b>1355.4</b>  | 2.2    |
| <b>V-Ha</b>    | 0.3           | 0.0        | 0.2          | 2.5           | 0.0        | 2.4            | 0.0           | 4.8            | 0.1          | 0.0           | 0.0        | 35.4         | 0.1          | <b>45.8</b>    | 45.8   |
| <b>V-Hb</b>    | 29.7          | 0.0        | 0.0          | 20.2          | 0.0        | 32.2           | 3.6           | 21.9           | 12.8         | 0.0           | 0.0        | 510.9        | 11.0         | <b>642.4</b>   | 131.5  |
| <b>NF</b>      | 9.3           | 0.0        | 0.0          | 0.0           | 0.0        | 0.7            | 1.3           | 1.8            | 0.0          | 0.0           | 0.0        | 0.0          | 249.1        | <b>262.1</b>   | 13.0   |
| <b>TOTAL</b>   | <b>3366.0</b> | <b>3.4</b> | <b>402.6</b> | <b>3014.4</b> | <b>0.4</b> | <b>12743.0</b> | <b>8996.0</b> | <b>18322.8</b> | <b>189.8</b> | <b>1371.0</b> | <b>0.0</b> | <b>740.3</b> | <b>564.2</b> |                |        |
| <b>Gains</b>   | 852.2         | 0.0        | 23.6         | 108.8         | 0.0        | 4558.4         | 734.5         | 890.5          | 18.2         | 17.8          | 0.0        | 229.3        | 315.1        |                |        |
| <b>Balance</b> | 750.9         | 0.0        | -154.7       | 38.2          | 0.0        | 4412.9         | -3839.8       | -1545.4        | -31.9        | 15.6          | -45.8      | 97.9         | 302.0        |                |        |

**Table S7.** Matrix of changes in fuel types (in hectares) between 2000 and 2018 in the burned area by unseasonal fires only

|                | F-FOL        | F-PIN      | F-RAC        | M-CAD         | M-ESC      | M-EUC         | M-PIN         | V-MAa          | V-MMb       | V-MH          | V-Ha       | V-Hb         | NF           | TOTAL          | Losses        |
|----------------|--------------|------------|--------------|---------------|------------|---------------|---------------|----------------|-------------|---------------|------------|--------------|--------------|----------------|---------------|
| <b>F-FOL</b>   | 711.2        | 0.0        | 0.6          | 0.1           | 0.0        | 9.2           | 2.8           | 0.0            | 0.0         | 0.0           | 0.0        | 0.9          | 0.8          | <b>725.5</b>   | <i>14.2</i>   |
| <b>F-PIN</b>   | 0.0          | 0.0        | 0.0          | 0.0           | 0.0        | 0.0           | 0.0           | 0.0            | 0.0         | 0.0           | 0.0        | 0.0          | 0.0          | <b>0.0</b>     | <i>0.0</i>    |
| <b>F-RAC</b>   | 0.0          | 0.0        | 155.3        | 0.0           | 0.0        | 0.7           | 1.0           | 4.5            | 0.0         | 0.0           | 0.0        | 0.0          | 0.0          | <b>161.4</b>   | <i>6.1</i>    |
| <b>M-CAD</b>   | 8.4          | 0.0        | 0.1          | 1456.2        | 0.0        | 2.8           | 0.7           | 3.6            | 1.3         | 0.0           | 0.0        | 0.7          | 0.0          | <b>1473.8</b>  | <i>17.6</i>   |
| <b>M-ESC</b>   | 0.0          | 0.0        | 0.0          | 0.0           | 0.0        | 0.0           | 0.0           | 0.0            | 0.0         | 0.0           | 0.0        | 0.0          | 0.0          | <b>0.0</b>     | <i>0.0</i>    |
| <b>M-EUC</b>   | 3.6          | 0.0        | 0.0          | 0.0           | 0.0        | 798.6         | 1.7           | 0.1            | 0.0         | 0.0           | 0.0        | 0.8          | 3.6          | <b>808.5</b>   | <i>9.9</i>    |
| <b>M-PIN</b>   | 63.9         | 0.0        | 0.0          | 4.5           | 0.0        | 396.6         | 2916.1        | 50.6           | 0.0         | 0.0           | 0.0        | 44.2         | 12.5         | <b>3488.4</b>  | <i>572.3</i>  |
| <b>V-MAa</b>   | 140.2        | 0.0        | 20.9         | 72.0          | 0.0        | 109.9         | 624.8         | 11837.3        | 1.3         | 5.8           | 0.0        | 14.2         | 20.1         | <b>12846.5</b> | <i>1009.3</i> |
| <b>V-MMb</b>   | 11.0         | 0.0        | 0.0          | 3.1           | 0.0        | 0.2           | 1.8           | 7.9            | 57.2        | 0.0           | 0.0        | 2.1          | 0.0          | <b>83.5</b>    | <i>26.2</i>   |
| <b>V-MH</b>    | 0.2          | 0.0        | 0.0          | 0.0           | 0.0        | 0.0           | 1.6           | 0.0            | 0.0         | 1770.8        | 0.0        | 0.0          | 5.9          | <b>1778.5</b>  | <i>7.6</i>    |
| <b>V-Ha</b>    | 0.0          | 0.0        | 0.0          | 0.7           | 0.0        | 0.1           | 0.0           | 0.3            | 0.0         | 0.0           | 0.0        | 27.0         | 0.0          | <b>28.1</b>    | <i>28.1</i>   |
| <b>V-Hb</b>    | 13.3         | 0.0        | 0.0          | 8.9           | 0.0        | 2.1           | 2.1           | 18.8           | 9.4         | 0.0           | 0.0        | 506.7        | 1.6          | <b>562.9</b>   | <i>56.2</i>   |
| <b>NF</b>      | 0.0          | 0.0        | 0.0          | 0.0           | 0.0        | 0.0           | 0.0           | 0.2            | 0.0         | 0.0           | 0.0        | 0.0          | 58.1         | <b>58.3</b>    | <i>0.2</i>    |
| <b>TOTAL</b>   | <b>951.8</b> | <b>0.0</b> | <b>176.9</b> | <b>1545.5</b> | <b>0.0</b> | <b>1320.2</b> | <b>3552.7</b> | <b>11923.2</b> | <b>69.2</b> | <b>1776.6</b> | <b>0.0</b> | <b>596.7</b> | <b>102.5</b> |                |               |
| <b>Gains</b>   | <i>240.6</i> | <i>0.0</i> | <i>21.6</i>  | <i>89.3</i>   | <i>0.0</i> | <i>521.6</i>  | <i>636.5</i>  | <i>85.9</i>    | <i>11.9</i> | <i>5.8</i>    | <i>0.0</i> | <i>90.0</i>  | <i>44.5</i>  |                |               |
| <b>Balance</b> | 226.3        | 0.0        | 15.5         | 71.7          | 0.0        | 511.7         | 64.2          | -923.3         | -14.3       | -1.8          | -28.1      | 33.8         | 44.3         |                |               |
